# Supplementary material
Source: publisher site journal article supplement (https://www.dovepress.com/get_supplementary_file.php?f=382895.docx)
Supplement: Supplementary file 1 [file get_supplementary_file.php]

ORIGINAL RESEARCH

Kongratanapasert et al

**Pharmacological Activities of Fingerroot Extract and Its Phytoconstituents Against SARS-CoV-2 Infection in Golden Syrian Hamsters**

Teetat Kongratanapasert1*

Supasek Kongsomros2*

Nlin Arya3,

Kripitch Sutummaporn3

Witthawat Wiriyarat3

Yada Akkhawattanangkul4

Tussapon Boonyarattanasoonthorn5

Nithi Asavapanumas5

Phongthon Kanjanasirirat6

Ampa Suksatu2

Khanit Sa-ngiamsuntorn7

Suparerk Borwornpinyo6,8

Pornpun Vivithanaporn5

Somchai Chutipongtanate5,9

Suradej Hongeng6,9

Boonsong Ongphiphadhanakul10

Arunee Thitithanyanont2

Phisit Khemawoot5

Piyamitr Sritara10

*These authors contributed equally to this work

1 Program in Translational Medicine, Faculty of Medicine Ramathibodi Hospital, Mahidol University, Bangkok, 10400, Thailand; 2 Department of Microbiology, Faculty of Science, Mahidol University, Bangkok, Thailand; 3 Department of Preclinic and Applied Animal Science, Faculty of Veterinary Science, Mahidol University, Nakhonpathom, 73170, Thailand; 4 Department of Clinical Medicine and Public Health, Faculty of Veterinary Science, Mahidol University, Nakhonpathom, 73170, Thailand; 5 Chakri Naruebodindra Medical Institute, Faculty of Medicine Ramathibodi Hospital, Mahidol University, Samutprakarn, 10540, Thailand; 6 Excellence Center for Drug Discovery, Faculty of Science, Mahidol University, Bangkok 10400, Thailand; 7 Department of Biochemistry, Faculty of Pharmacy, Mahidol University, Bangkok 10400, Thailand; 8 Department of Biotechnology, Faculty of Science, Mahidol University, Bangkok 10400, Thailand; 9 Department of Pediatrics, Faculty of Medicine Ramathibodi Hospital, Mahidol University, Bangkok 10400, Thailand; 10 Department of Medicine, Faculty of Medicine Ramathibodi Hospital, Mahidol University, Bangkok 10400, Thailand;

Corresponding author: Phisit Khemawoot.

Chakri Naruebodindra Medical Institute, Faculty of Medicine Ramathibodi Hospital, Mahidol University, Bang Phli, Samut Prakarn 10540, Thailand

Tel +66 28395161

Fax +66 28395161

E-mail phisit.khe@mahidol.ac.th

**Contents**

**Figure S1.** LCMS chromatograms. (**A**) Chromatogram of fingerroot extract. (**B**) Chromatogram of panduratin A. (**C**) LCMS mass spectra of panduratin A.

**Table S1.** Bioanalytical method validation of LCMS for panduratin A.

**Table S2.** The criteria of histopathological scoring of lung tissues.


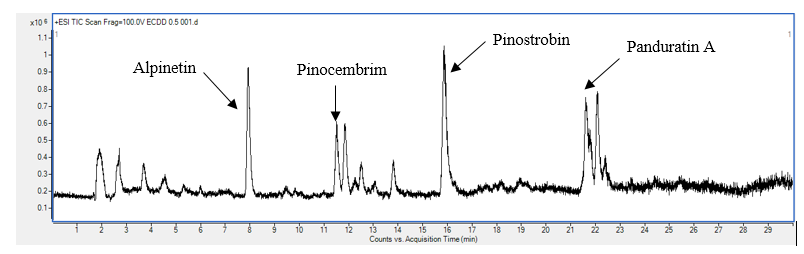


**A**


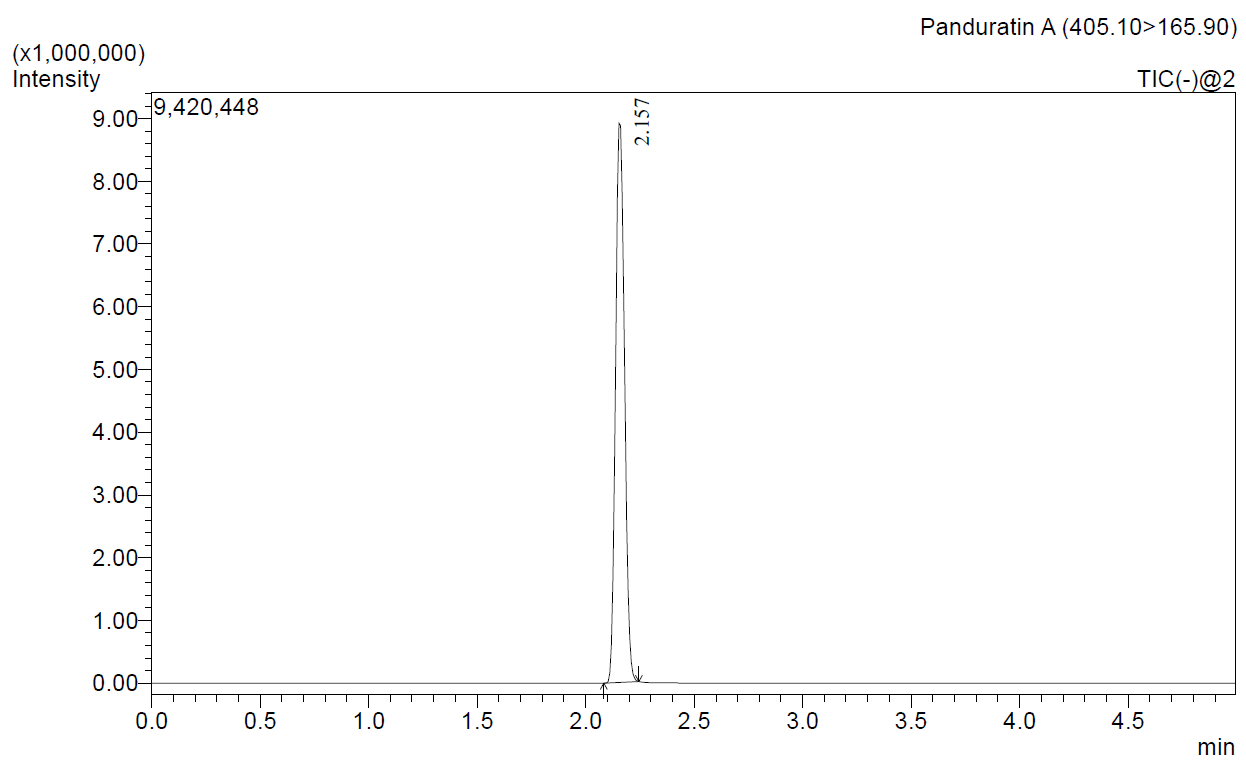


**C**

**B**

**Figure S1.** LCMS chromatograms. (**A**) Chromatogram of fingerroot extract. (**B**) Chromatogram of panduratin A. (**C**) LCMS mass spectra of panduratin A.

|  | conditions | Concentration (µg/L) | Mean | SD | Accuracy (%RE) | Precision (%CV) | Absolute recovery  (%) |
| --- | --- | --- | --- | --- | --- | --- | --- |
| Panduratin A | Intra-day | 600 | 620.16 | 14.08 | 3.36 | 2.39 | N/A |
|  |  | 150 | 163.25 | 3.46 | 8.83 | 2.12 | N/A |
|  |  | 10 | 11.21 | 1.03 | 12.13 | 9.18 | N/A |
|  | Inter-day | 600 | 629.03 | 51.01 | 4.84 | 8.11 | N/A |
|  |  | 150 | 163.44 | 9.73 | 8.96 | 5.95 | N/A |
|  |  | 10 | 11.22 | 1.30 | 12.24 | 11.55 | N/A |
|  | Room temperature (12 h) | 600 | 652.70 | 21.51 | 8.78 | 3.30 | N/A |
| 150 | 161.74 | 7.80 | 7.82 | 4.82 | N/A |
| 10 | 10.89 | 0.63 | 8.94 | 5.74 | N/A |
| 3 freeze-thaw cycles | 600 | 668.96 | 14.41 | 11.49 | 2.15 | N/A |
| 150 | 166.51 | 8.28 | 11.00 | 4.97 | N/A |
| 10 | 10.37 | 0.82 | 3.66 | 7.93 | N/A |
| Storage at  -20°C | 600 | 580.72 | 35.16 | -3.21 | 6.05 | N/A |
| 150 | 152.78 | 17.30 | 1.86 | 11.33 | N/A |
| 10 | 10.76 | 1.57 | 7.58 | 14.55 | N/A |
| Autosampler | 600 | 652.86 | 19.59 | 8.81 | 3.00 | N/A |
| 150 | 157.97 | 8.01 | 5.31 | 5.07 | N/A |
| 10 | 11.73 | 0.68 | 11.73 | 6.13 | N/A |
|  | Recovery | 600 | 635.70 | 40.94 | 5.95 | 6.44 | 97.09 |
|  | extract | 150 | 159.09 | 15.22 | 6.06 | 9.57 | 102.58 |
|  |  | 10 | 11.14 | 1.34 | 11.40 | 12.04 | 101.76 |
|  | Recovery | 600 | 654.75 | 20.35 | 9.13 | 3.11 | N/A |
|  | un-extract | 150 | 155.08 | 3.88 | 3.39 | 2.50 | N/A |
|  |  | 10 | 10.95 | 0.38 | 9.47 | 3.49 | N/A |

**Table S1.** Bioanalytical method validation of LCMS for panduratin A.

RE: relative error; CV: coefficient of variation.

**Table S2.** The criteria of histopathological scoring of lung tissues.

| **Score** | **Interstitial pneumonia** | **Bronchiole and alveolar lesion** | **Cellular lesions** | **Vascular lesions** | **Immunohistochemistry** |
| --- | --- | --- | --- | --- | --- |
| 0 | absent | absent | absent | absent | absent |
| 1 | minimal <10% | minimal  <10% | present | minimal  <10% | airway or alveoli |
| 2 | mild  10-50% | mild  10-50% |  | mild  10-50% | airway and alveoli |
| 3 | moderate  50-70% | moderate  50-70% |  | moderate  50-70% |  |
| 4 | severe  >70% | severe  >70% |  | severe  >70% |  |
